# Supplementary material for: Structure and topography of the synaptic V-ATPase–synaptophysin complex
Source: Springer Nature journal article supplement (doi:10.1038/s41586-024-07610-x), 2024-06-05
Supplement: MOESM1 [file 41586_2024_7610_MOESM1_ESM.pdf]

---

**Supplementary information**

---

**Structure and topography of the synaptic  
V-ATPase–synaptophysin complex**

---

In the format provided by the  
authors and unedited

## Supplementary Information

### Structure and Topography of the Synaptic V-ATPase–Synaptophysin Complex

Chuchu Wang<sup>1-5†</sup>, Wenhong Jiang<sup>6†</sup>, Jeremy Leitz<sup>1-5†</sup>, Kailu Yang<sup>1-5</sup>, Luis Esquivies<sup>1-5</sup>, Xing Wang<sup>6</sup>, Xiaotao Shen<sup>7,8</sup>, Richard Held<sup>1-5</sup>, Daniel J. Adams<sup>9</sup>, Tamara Basta<sup>9</sup>, Lucas Hampton<sup>9</sup>, Ruiqi Jian<sup>7,8</sup>, Lihua Jiang<sup>7,8</sup>, Michael H.B. Stowell<sup>9</sup>, Wolfgang Baumeister<sup>10</sup>, Qiang Guo<sup>6§</sup>, Axel T. Brunger<sup>1-5§</sup>

<sup>1</sup>Department of Molecular and Cellular Physiology, Stanford University, Stanford, United States

<sup>2</sup>Department of Neurology and Neurological Sciences, Stanford University, Stanford, United States

<sup>3</sup>Department of Structural Biology, Stanford University, Stanford, United States

<sup>4</sup>Department of Photon Science, Stanford University, Stanford, United States

<sup>5</sup>Howard Hughes Medical Institute, Stanford University, Stanford, United States

<sup>6</sup>State Key Laboratory of Protein and Plant Gene Research, School of Life Sciences and Peking-Tsinghua Center for Life Sciences, Peking University, Beijing 100871, China

<sup>7</sup>Department of Genetics, Stanford University, Stanford, United States.

<sup>8</sup>Stanford Center for Genomics and Personalized Medicine, Stanford University, Stanford, United States.

<sup>9</sup>Department of Molecular, Cellular, and Developmental Biology, University of Colorado, Boulder, CO 80309

<sup>10</sup>Department of Structural Biology, Max Planck Institute of Biochemistry, 82152

<sup>†</sup>These authors contributed equally

<sup>§</sup>Correspondence: [brunger@stanford.edu](mailto:brunger@stanford.edu), [guo.qiang@pku.edu.cn](mailto:guo.qiang@pku.edu.cn)

## Table of contents

|                                                                                                                                                                                                 | Page |
|-------------------------------------------------------------------------------------------------------------------------------------------------------------------------------------------------|------|
| <b>Supplementary Table 1</b> – List of wild-type ISV proteins identified by high-resolution mass-spectrometry with map cross-correlation scores. Separate Excel file (SupplementaryTable1.xlsx) |      |
| <b>Supplementary Table 2</b> – Identification of unique peptides of the V-ATPase subunit e2 from wild-type ISV samples.                                                                         | 3    |
| <b>Supplementary Table 3</b> – Root-mean square differences between V-ATPase structures.                                                                                                        | 3    |
| <b>Supplementary Table 4</b> – Copy numbers of intact V-ATPase assemblies per ISV.                                                                                                              | 3    |
| <b>Supplementary Table 5</b> – Copy numbers of V0-only V-ATPase assemblies per ISV.                                                                                                             | 4    |

**Supplementary Table 2.** Identification of unique peptides of the V-ATPase subunit e2 from wild-type ISV samples

| Identified protein | Biological replicate | Score | Unique peptide <sup>1</sup> |
|--------------------|----------------------|-------|-----------------------------|
| <b>ATP6V0E2</b>    | ISV-1                | 307.7 | Y.VRFLWE.                   |
|                    | ISV-2                | 308.8 | F.TTF.I                     |
|                    | ISV-3                | 303.7 | F.TTF.W                     |

<sup>1</sup>The spectrum score uses Byonic's scoring algorithm.

**Supplementary Table 3.** Root-mean-square differences between V-ATPase structures

| RMSD (Å)                         | V-ATPase       | In wild-type ISVs |         |         |         |
|----------------------------------|----------------|-------------------|---------|---------|---------|
|                                  |                | State 1           | State 2 | State 3 | V0-only |
| <b>In Syp<sup>-/-</sup> ISVs</b> | <b>State 1</b> | 2.3               |         |         |         |
|                                  | <b>State 2</b> |                   | 2.1     |         |         |
|                                  | <b>State 3</b> |                   |         | 1       |         |
|                                  | <b>V0-only</b> |                   |         |         | 1.7     |
| <b>PDB IDs of other State 2</b>  | <b>6WM3</b>    |                   | 3.3     |         |         |
|                                  | <b>7U4T</b>    |                   | 3.8     |         |         |
|                                  | <b>6VQG</b>    |                   | 4       |         |         |
|                                  | <b>7UNF</b>    |                   | 4.1     |         |         |

Structures were globally aligned by superimposing Cα atoms and root-mean-square differences (RMSDs) calculated for Cα atoms. State 2 was used for comparisons of wild-type intact V-ATPase with the other mammalian structures (PDB IDs: 6WM3, 7U4T, 6VQG, 7UNF) since the 7UNF deposition only includes State 2.

**Supplementary Table 4.** Copy numbers of intact V-ATPase assemblies

| Intact V-ATPase copy number                             | Number of ISVs |                    | Percentage <sup>1</sup> |                    |
|---------------------------------------------------------|----------------|--------------------|-------------------------|--------------------|
|                                                         | wild-type      | Syp <sup>-/-</sup> | wild-type               | Syp <sup>-/-</sup> |
| 0                                                       | 2228           | 927                |                         |                    |
| 1                                                       | 945            | 688                | <b>71.3</b>             | <b>47.4</b>        |
| 2                                                       | 290            | 419                | <b>21.9</b>             | <b>28.8</b>        |
| 3                                                       | 72             | 218                | <b>5.4</b>              | <b>15.0</b>        |
| 4                                                       | 15             | 79                 | <b>1.1</b>              | <b>5.4</b>         |
| 5                                                       | 4              | 28                 | <b>0.3</b>              | <b>1.9</b>         |
| 6                                                       | 0              | 11                 | <b>0.0</b>              | <b>0.8</b>         |
| 7                                                       | 0              | 6                  | <b>0.0</b>              | <b>0.4</b>         |
| 8                                                       | 0              | 4                  | <b>0.0</b>              | <b>0.3</b>         |
| <b>Total examined number of ISVs</b>                    | <b>3554</b>    | <b>2380</b>        |                         |                    |
| <b>Number of ISVs with at least one intact V-ATPase</b> | <b>1326</b>    | <b>1453</b>        |                         |                    |

<sup>1</sup>Normalized to the number ISVs with at least one intact V-ATPase

**Supplementary Table 5.** Copy numbers of V0-only V-ATPase assemblies

| V0-only V-ATPase copy number                             | Number of ISVs |                    | Percentage <sup>1</sup> |                    |
|----------------------------------------------------------|----------------|--------------------|-------------------------|--------------------|
|                                                          | wildtype       | Syp <sup>-/-</sup> | wild-type               | Syp <sup>-/-</sup> |
| 0                                                        | 197            | 233                |                         |                    |
| 1                                                        | 86             | 130                | <b>81.1</b>             | <b>69.1</b>        |
| 2                                                        | 18             | 46                 | <b>17.0</b>             | <b>24.5</b>        |
| 3                                                        | 2              | 11                 | <b>1.9</b>              | <b>5.9</b>         |
| 4                                                        | 0              | 1                  | <b>0.0</b>              | <b>0.5</b>         |
| <b>Total examined number of ISVs</b>                     | <b>303</b>     | <b>421</b>         |                         |                    |
| <b>Number of ISVs with at least one V0-only V-ATPase</b> | <b>106</b>     | <b>188</b>         |                         |                    |

<sup>1</sup>Normalized to the number ISVs with at least one V0-only V-ATPase.
